# Supplementary material for: Age- and gender-dependent differences in attitudes towards COVID-19 vaccination and underlying psychological processes
Source: bioRxiv or medRxiv preprint supplement (doi:10.1101/2021.05.28.21257954), 2021-05-28
Supplement: Supplementary file [file media-1.pdf]

## Supplementary Information for

Age- and gender-dependent differences in attitudes towards COVID-19 vaccination and underlying psychological processes

Toshiko Tanaka<sup>1</sup>, Tsuyoshi Nihonsugi<sup>2</sup>, Fumio Ohtake<sup>3</sup> & Masahiko Haruno\*<sup>1,4</sup>

### *affiliations*

1.Center for Information and Neural Networks (CiNet), National Institute of Information and Communications Technology (NICT), Suita, Japan

2.Faculty of Economics, Osaka University of Economics, Osaka, Japan

3.Graduate School of Economics, Osaka University, Toyonaka, Japan

4.Graduate School of Frontier Biosciences, Osaka University, Suita, Japan

Correspondance should be addressed to Dr. Masahiko Haruno, Center for Information and Neural Networks, National Institute of Information and Communications Technology, Suita,Osaka 565-0871, Japan. E-mail: [mharuno@nict.go.jp](mailto:mharuno@nict.go.jp).

### **Abstract**

The most promising way to prevent the explosive spread of COVID-19 infection is to achieve herd immunity through vaccination. It is therefore important to motivate those who are less willing to be vaccinated. To address this issue, we conducted an online survey of 6232 Japanese people to investigate age- and gender- dependent differences in attitudes towards COVID-19 vaccination and the underlying psychological processes. We asked participants to read one of nine different messages about COVID-19 vaccination and rate their willingness to be vaccinated. We also collected their 17 social personality trait scores and demographic information. We found that males 10-20 years old showed the minimum willingness to be vaccinated. We also found that prosocial traits are the driving force for young people, but the motivation in older people also depends on risk aversion and self-interest. Furthermore, an analysis of 9 different messages demonstrated that for young people (particularly males), the message emphasizing the majority's intention to vaccinate and scientific evidence for the safety of the vaccination had the strongest positive effect on the willingness to be vaccinated, suggesting that the herding effect arising from the "majority + scientific evidence" message nudges young people to show their prosocial nature in action.

Figure S1. Subjective evaluation of messages.

The percentage of people who scored in each of the seven subjective ratings (responsibleness, empathy, peer pressure, repulsed, uncomfortable, stimulating, and memorable) by gender and age are shown. Feelings of responsibility were lower among men in their 10-20s in response to nudge 2 ( $p = 4.9 \times 10^{-3}$ ). No significantly greater senses of repulsion or discomfort occurred in response to nudge 8. Significant differences compared with control (nudge 1) are indicated by the asterisks (\*). The p-values of the black asterisks for feeling responsible are, from left (male) to right (female),  $4.9 \times 10^{-3}$ , 0.043,  $7.6 \times 10^{-3}$ , and 0.031, and those of the blue asterisks are 0.012, 0.024, 0.011, and 0.021; for empathy, they are 0.038, 0.035, 0.027, and 0.013 and 0.041 and 0.022, respectively; for peer pressure, they are 0.021 and 0.019 and  $9.4 \times 10^{-3}$ , 0.010, and 0.044, respectively; for repulsion, they are 0.031 and 0.036, respectively; for discomfort, they are 0.047 and 0.030, 0.049, and 0.028, respectively; for stimulating, they are 0.036, 0.033, and  $7.1 \times 10^{-3}$  and  $7.4 \times 10^{-3}$ , 0.011, 0.037, and 0.022, respectively; and for feeling memorable, they are 0.019, 0.045, and 0.032.

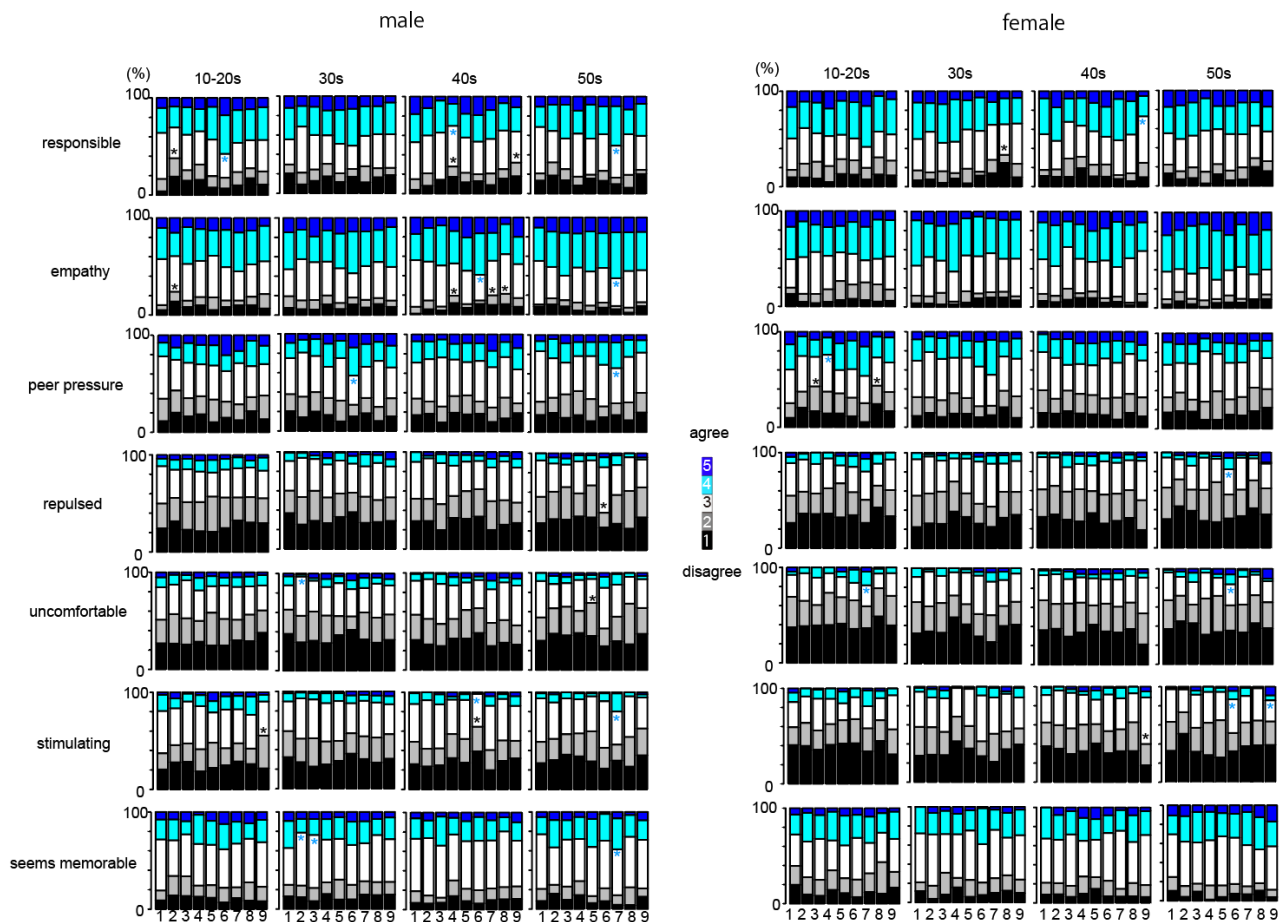

Table S1. Detailed list of the personality tests used in this study.

| Abbreviation            | subscore abbreviation (item number) | Questionnaire name                                                      | references |
|-------------------------|-------------------------------------|-------------------------------------------------------------------------|------------|
| Big5                    |                                     | Big Five personality traits                                             | 1,2        |
| Extraversion            | Big5_E (12)                         |                                                                         |            |
| Agreeableness           | Big5_A (12)                         |                                                                         |            |
| Conscientiousness       | Big5_C (12)                         |                                                                         |            |
| Neuroticism             | Big5_N (12)                         |                                                                         |            |
| Openness                | Big5_O (12)                         |                                                                         |            |
| IRI                     |                                     | Interpersonal Reactivity Index                                          | 3,4        |
| Fantasy                 | IRI_F (7)                           |                                                                         |            |
| Perspective taking      | IRI_PT (7)                          |                                                                         |            |
| Empathic Concern        | IRI_EC (7)                          |                                                                         |            |
| Personal Distress       | IRI_PD (7)                          |                                                                         |            |
| MVS                     | (20)                                | Machiavellianism Scale                                                  | 5,6        |
| PSS                     | (10)                                | Perceived Subjective Stress                                             | 7,8        |
| RA                      | (10)                                | Risk Aversion                                                           | 9,10       |
| RSS                     | (10)                                | Rosenberg Self - Esteem scale                                           | 11,12      |
| SES                     | (1)                                 | Socio Economic Status                                                   | 13,14      |
| SVO                     |                                     | Social Value Orientation                                                | 15,16      |
| Prosocial               | SVO_P (8)                           |                                                                         |            |
| individualist           | SVO_I (8)                           |                                                                         |            |
| Competitor              | SVO_C (8)                           |                                                                         |            |
| STAI                    |                                     | State - Trait Anxiety Inventory                                         | 17,18      |
| State                   | STAI_S (20)                         |                                                                         |            |
| trait                   | STAI_T (20)                         |                                                                         |            |
| TIM                     | (15)                                | Time discounting                                                        | 19,20      |
| CCP                     | (1)                                 | conditional cooperation                                                 | 21         |
| TRU                     |                                     |                                                                         |            |
| trust                   | TRU_GSSWVS (1)                      | the World Values survey/the American General Social Survey              |            |
| fairness                | TRU_WVS (1)                         | the World Values survey                                                 |            |
| altruism                | TRU_GSS (1)                         | the American General Social Survey                                      |            |
| LAR                     | loss aversion (6)                   | lottery choice task                                                     | 22         |
| Inequity Guilt aversion |                                     |                                                                         | 27         |
| guilt-aversion          | guilt                               |                                                                         |            |
| inequity-aversion       | inequity                            |                                                                         |            |
| ES                      |                                     | Empathizing–Systemizing theory                                          | 23         |
| Systemizing             | ES_S (20)                           |                                                                         |            |
| Empathizing             | ES_E (20)                           |                                                                         |            |
| SHS                     | (4)                                 | Tendency to give socially desirable answers                             | 24,25      |
| IQ                      | (9)                                 | Raven Advanced Progressive Matrices test<br>#11,24,28,36,43,48,49,53,55 | 26         |

Table S2. Subjective evaluation of the messages.

| items         | nudge | all   |      |               |       |             |      |            |        |           |         | male  |      |               |      |             |      |            |        |          |         | female |      |               |      |             |       |            |   |          |         |
|---------------|-------|-------|------|---------------|-------|-------------|------|------------|--------|-----------|---------|-------|------|---------------|------|-------------|------|------------|--------|----------|---------|--------|------|---------------|------|-------------|-------|------------|---|----------|---------|
|               |       | total |      | disagree (12) |       | neutral (3) |      | agree (45) |        | F/chi_sq  | p_value | total |      | disagree (12) |      | neutral (3) |      | agree (45) |        | F/chi_sq | p_value | total  |      | disagree (12) |      | neutral (3) |       | agree (45) |   | F/chi_sq | p_value |
|               |       | n     | %    | n             | %     | n           | %    | n          | %      |           |         | n     | %    | n             | %    | n           | %    | n          | %      |          |         | n      | %    | n             | %    | n           | %     | n          | % |          |         |
|               |       | 6232  |      |               |       |             |      |            |        |           |         | 3409  |      |               |      |             |      |            |        |          |         | 2823   |      |               |      |             |       |            |   |          |         |
| responsible   | total | 1285  | 20.6 | 2180          | 35.0  | 2627        | 42.2 |            |        |           | 806     | 23.6  | 1216 | 35.7          | 1387 | 40.7        |      |            |        |          | 619     | 21.9   | 964  | 34.1          | 1240 | 43.9        |       |            |   |          |         |
|               | 1     | 705   | 14.0 | 19.9          | 259   | 36.7        | 306  | 43.4       | 29.517 | 0.0207    | 382     | 8.0   | 20.9 | 149           | 39.0 | 153         | 40.1 | 30.59      | 0.0152 | 323      | 6.0     | 18.6   | 110  | 34.1          | 153  | 47.4        | 19.29 | 0.254      |   |          |         |
|               | 2     | 695   | 16.2 | 23.3          | 258   | 37.1        | 275  | 39.6       |        |           | 384     | 10.5  | 27.3 | 146           | 38.0 | 133         | 34.6 |            |        | 311      | 5.7     | 18.3   | 112  | 36.0          | 142  | 45.7        |       |            |   |          |         |
|               | 3     | 684   | 15.5 | 22.7          | 244   | 35.7        | 285  | 41.7       |        |           | 376     | 8.4   | 22.3 | 143           | 38.0 | 149         | 39.6 |            |        | 308      | 7.1     | 23.1   | 101  | 32.8          | 136  | 44.2        |       |            |   |          |         |
|               | 4     | 689   | 16.3 | 23.7          | 246   | 35.7        | 270  | 39.2       |        |           | 369     | 9.8   | 26.6 | 138           | 37.4 | 133         | 36.0 |            |        | 310      | 6.5     | 21.0   | 108  | 34.8          | 137  | 44.2        |       |            |   |          |         |
|               | 5     | 711   | 15.5 | 21.8          | 247   | 34.7        | 309  | 43.5       |        |           | 388     | 7.9   | 20.4 | 136           | 35.1 | 173         | 44.6 |            |        | 323      | 7.6     | 23.5   | 111  | 34.4          | 136  | 42.1        |       |            |   |          |         |
|               | 6     | 699   | 15.0 | 21.5          | 220   | 31.5        | 329  | 47.1       |        |           | 381     | 8.3   | 21.8 | 116           | 30.4 | 182         | 47.8 |            |        | 318      | 6.7     | 21.1   | 104  | 32.7          | 147  | 46.2        |       |            |   |          |         |
|               | 7     | 695   | 14.8 | 21.3          | 224   | 32.2        | 323  | 46.5       |        |           | 387     | 8.7   | 22.5 | 126           | 32.6 | 174         | 45.0 |            |        | 308      | 6.1     | 19.8   | 98   | 31.8          | 149  | 48.4        |       |            |   |          |         |
|               | 8     | 677   | 17.1 | 25.3          | 240   | 35.5        | 266  | 39.3       |        |           | 367     | 8.9   | 24.3 | 136           | 37.1 | 142         | 38.7 |            |        | 310      | 8.2     | 26.5   | 104  | 33.5          | 124  | 40.0        |       |            |   |          |         |
|               | 9     | 687   | 18.1 | 26.3          | 242   | 35.2        | 264  | 38.4       |        |           | 375     | 10.1  | 26.9 | 126           | 33.6 | 148         | 39.5 |            |        | 312      | 8.0     | 25.6   | 116  | 37.2          | 116  | 37.2        |       |            |   |          |         |
| total         |       | 918   | 14.7 | 2170          | 34.8  | 3144        | 50.4 |            |        | 511       | 15.0    | 1218  | 35.7 | 1680          | 49.3 |             |      |            |        | 407      | 14.4    | 952    | 33.7 | 1464          | 51.9 |             |       |            |   |          |         |
| empathy       | 1     | 705   | 9.2  | 13.0          | 260   | 36.9        | 353  | 50.1       | 10.85  | 0.82      | 382     | 4.7   | 12.3 | 158           | 41.4 | 177         | 46.3 | 24.39      | 0.0814 | 323      | 4.5     | 13.9   | 102  | 31.6          | 176  | 54.5        | 11.06 | 0.806      |   |          |         |
|               | 2     | 695   | 10.7 | 15.4          | 252   | 36.3        | 336  | 48.3       |        |           | 384     | 6.6   | 17.2 | 146           | 38.0 | 172         | 44.8 |            |        | 311      | 4.1     | 13.2   | 106  | 34.1          | 164  | 52.7        |       |            |   |          |         |
|               | 3     | 684   | 9.4  | 13.7          | 251   | 36.7        | 339  | 49.6       |        |           | 376     | 5.0   | 13.3 | 136           | 36.2 | 190         | 50.5 |            |        | 308      | 4.4     | 14.3   | 115  | 37.3          | 149  | 48.4        |       |            |   |          |         |
|               | 4     | 689   | 10.2 | 14.8          | 236   | 34.3        | 341  | 49.5       |        |           | 369     | 6.5   | 17.6 | 130           | 35.2 | 174         | 47.2 |            |        | 310      | 3.7     | 11.9   | 106  | 34.2          | 167  | 53.9        |       |            |   |          |         |
|               | 5     | 711   | 10.5 | 14.8          | 239   | 33.6        | 367  | 51.6       |        |           | 388     | 4.8   | 12.4 | 142           | 36.6 | 198         | 51.0 |            |        | 323      | 5.7     | 17.6   | 97   | 30.0          | 169  | 52.3        |       |            |   |          |         |
|               | 6     | 699   | 10.5 | 15.0          | 224   | 32.0        | 370  | 52.9       |        |           | 381     | 5.7   | 15.0 | 114           | 29.9 | 210         | 55.1 |            |        | 318      | 4.8     | 15.1   | 110  | 34.6          | 160  | 50.3        |       |            |   |          |         |
|               | 7     | 695   | 10.7 | 15.4          | 223   | 32.1        | 365  | 52.5       |        |           | 387     | 5.8   | 15.0 | 126           | 32.6 | 203         | 52.5 |            |        | 308      | 4.9     | 15.9   | 97   | 31.5          | 162  | 52.6        |       |            |   |          |         |
|               | 8     | 677   | 10.0 | 14.8          | 244   | 36.0        | 333  | 49.2       |        |           | 367     | 5.9   | 16.1 | 138           | 37.6 | 170         | 46.3 |            |        | 310      | 4.1     | 13.2   | 106  | 34.2          | 163  | 52.6        |       |            |   |          |         |
|               | 9     | 687   | 10.6 | 15.4          | 241   | 35.1        | 340  | 49.5       |        |           | 375     | 6.1   | 16.3 | 128           | 34.1 | 186         | 49.6 |            |        | 312      | 4.5     | 14.4   | 113  | 36.2          | 154  | 49.4        |       |            |   |          |         |
|               | total |       | 2088 | 33.5          | 2351  | 37.7        | 1793 | 28.8       |        |           | 1141    | 33.5  | 1324 | 38.8          | 944  | 27.7        |      |            |        |          | 947     | 33.5   | 1027 | 36.4          | 849  | 30.1        |       |            |   |          |         |
| peer pressure | 1     | 705   | 23.5 | 33.3          | 280   | 39.7        | 190  | 27.0       | 45.00  | 1.39x10-4 | 382     | 13.2  | 34.6 | 161           | 42.1 | 89          | 23.3 | 30.68      | 0.015  | 323      | 10.3    | 31.9   | 119  | 36.8          | 101  | 31.3        | 30.88 | 0.014      |   |          |         |
|               | 2     | 695   | 24.3 | 35.0          | 281   | 40.4        | 171  | 24.6       |        |           | 384     | 13.7  | 35.7 | 157           | 40.9 | 90          | 23.4 |            |        | 311      | 10.6    | 34.1   | 124  | 39.9          | 81   | 26.0        |       |            |   |          |         |
|               | 3     | 684   | 24.1 | 35.2          | 254   | 37.1        | 189  | 27.6       |        |           | 376     | 13.2  | 35.1 | 148           | 39.4 | 96          | 25.5 |            |        | 308      | 10.9    | 35.4   | 106  | 34.4          | 93   | 30.2        |       |            |   |          |         |
|               | 4     | 689   | 24.4 | 35.4          | 251   | 36.4        | 184  | 26.7       |        |           | 369     | 13.8  | 37.4 | 128           | 34.7 | 103         | 27.9 |            |        | 310      | 10.6    | 34.2   | 123  | 39.7          | 81   | 26.1        |       |            |   |          |         |
|               | 5     | 711   | 24.4 | 34.3          | 264   | 37.1        | 203  | 28.6       |        |           | 388     | 13.2  | 34.0 | 154           | 39.7 | 102         | 26.3 |            |        | 323      | 11.2    | 34.7   | 110  | 34.1          | 101  | 31.3        |       |            |   |          |         |
|               | 6     | 699   | 20.1 | 28.8          | 261   | 37.3        | 237  | 33.9       |        |           | 381     | 11.0  | 28.9 | 141           | 37.0 | 130         | 34.1 |            |        | 318      | 9.1     | 28.6   | 120  | 37.7          | 107  | 33.6        |       |            |   |          |         |
|               | 7     | 695   | 20.0 | 28.8          | 248   | 35.7        | 247  | 35.5       |        |           | 387     | 11.4  | 29.5 | 146           | 37.7 | 127         | 32.8 |            |        | 308      | 8.6     | 27.9   | 102  | 33.1          | 120  | 39.0        |       |            |   |          |         |
|               | 8     | 677   | 23.8 | 35.2          | 270   | 39.9        | 169  | 25.0       |        |           | 367     | 11.5  | 31.3 | 157           | 42.8 | 95          | 25.9 |            |        | 310      | 12.3    | 39.7   | 113  | 36.5          | 74   | 23.9        |       |            |   |          |         |
|               | 9     | 687   | 24.2 | 35.2          | 242   | 35.2        | 203  | 29.5       |        |           | 375     | 13.1  | 34.9 | 132           | 35.2 | 112         | 29.9 |            |        | 312      | 11.1    | 35.6   | 110  | 35.3          | 91   | 29.2        |       |            |   |          |         |
|               | total |       | 3569 | 6.3864        | 2005  | 289.1       | 655  | 94.458     |        |           | 1889    | 55.4  | 1134 | 33.3          | 386  | 11.3        |      |            |        |          | 1683    | 59.6   | 871  | 30.9          | 269  | 9.5         |       |            |   |          |         |
| repulsed      | 1     | 705   | 3.98 | 56.5          | 248.0 | 35.2        | 59   | 8.4        | 32.52  | 8.55x10-3 | 382     | 2.09  | 54.7 | 137           | 35.9 | 36          | 9.4  | 17         | 0.386  | 323      | 1.89    | 58.5   | 111  | 34.4          | 23   | 7.1         | 31.25 | 0.0125     |   |          |         |
|               | 2     | 695   | 4.08 | 58.7          | 234.0 | 33.7        | 53   | 7.6        |        |           | 384     | 2.12  | 55.2 | 137           | 35.7 | 35          | 9.1  |            |        | 311      | 1.96    | 63.0   | 97   | 31.2          | 18   | 5.8         |       |            |   |          |         |
|               | 3     | 684   | 3.93 | 57.5          | 212.0 | 31.0        | 79   | 11.5       |        |           | 376     | 2.11  | 56.1 | 124           | 33.0 | 41          | 10.9 |            |        | 308      | 1.82    | 59.1   | 88   | 28.6          | 38   | 12.3        |       |            |   |          |         |
|               | 4     | 689   | 3.99 | 57.9          | 210.0 | 30.5        | 70   | 10.2       |        |           | 369     | 2.02  | 54.7 | 120           | 32.5 | 47          | 12.7 |            |        | 310      | 1.97    | 63.5   | 90   | 29.0          | 23   | 7.4         |       |            |   |          |         |
|               | 5     | 711   | 4.36 | 61.3          | 199.0 | 28.0        | 73   | 10.3       |        |           | 388     | 2.34  | 60.3 | 113           | 29.1 | 41          | 10.6 |            |        | 323      | 2.05    | 63.5   | 86   | 26.6          | 32   | 9.9         |       |            |   |          |         |
|               | 6     | 699   | 3.78 | 54.1          | 234.0 | 33.5        | 87   | 12.4       |        |           | 381     | 2.05  | 53.8 | 129           | 33.9 | 47          | 12.3 |            |        | 318      | 1.73    | 54.4   | 105  | 33.0          | 40   | 12.6        |       |            |   |          |         |
|               | 7     | 695   | 3.72 | 53.5          | 230.0 | 33.1        | 93   | 13.4       |        |           | 387     | 2.09  | 54.0 | 123           | 31.8 | 55          | 14.2 |            |        | 308      | 1.63    | 52.9   | 107  | 34.7          | 38   | 12.3        |       |            |   |          |         |
|               | 8     | 677   | 3.97 | 58.6          | 217.0 | 32.1        | 63   | 9.3        |        |           | 367     | 2.00  | 54.5 | 133           | 36.2 | 34          | 9.3  |            |        | 310      | 1.97    | 63.5   | 84   | 27.1          | 29   | 9.4         |       |            |   |          |         |
|               | 9     | 687   | 3.88 | 56.5          | 221.0 | 32.2        | 78   | 11.4       |        |           | 375     | 2.07  | 55.2 | 118           | 31.5 | 50          | 13.3 |            |        | 312      | 1.81    | 58.0   | 103  | 33.0          | 28   | 9.0         |       |            |   |          |         |
|               | total |       | 3761 | 60.3          | 1847  | 29.6        | 624  | 10.0       |        |           | 1934    | 56.7  | 1101 | 32.3          | 374  | 11.0        |      |            |        |          | 1827    | 64.7   | 746  | 26.4          | 250  | 8.9         |       |            |   |          |         |
| uncomfortable | 1     | 705   | 4.34 | 61.6          | 208.0 | 29.5        | 63   | 8.9        | 35.21  | 3.7x10-3  | 382     | 2.17  | 56.8 | 124           | 32.5 | 41          | 10.7 | 17.9       | 0.33   | 323      | 2.17    | 67.2   | 84   | 26.0          | 22   | 6.8         | 30.26 | 0.0167     |   |          |         |
|               | 2     | 695   | 4.22 | 60.7          | 224.0 | 32.2        | 49   | 7.1        |        |           | 384     | 2.20  | 57.3 | 133           | 34.6 | 31          | 8.1  |            |        | 311      | 2.02    | 65.0   | 91   | 29.3          | 18   | 5.8         |       |            |   |          |         |
|               | 3     | 684   | 4.07 | 59.5          | 209.0 | 30.6        | 68   | 9.9        |        |           | 376     | 2.14  | 56.9 | 127           | 33.8 | 35          | 9.3  |            |        | 308      | 1.93    | 62.7   | 82   | 26.6          | 33   | 10.7        |       |            |   |          |         |
|               | 4     | 689   | 4.21 | 61.1          | 193.0 | 28.0        | 65   | 9.4        |        |           | 369     | 2.05  | 55.6 | 117           | 31.7 | 47          | 12.7 |            |        | 310      | 2.16    | 69.7   | 76   | 24.5          | 18   | 5.8         |       |            |   |          |         |
|               | 5     | 711   | 4.52 | 63.6          | 194.0 | 27.3        | 65   | 9.1        |        |           | 388     | 2.38  | 61.3 | 112           | 28.9 | 38          | 9.8  |            |        | 323      | 2.14    | 66.3   | 82   | 25.4          | 27   | 8.4         |       |            |   |          |         |
|               | 6     | 699   | 4.00 | 57.2          | 210.0 | 30.0        | 89   | 12.7       |        |           | 381     | 2.06  | 54.1 | 126           | 33.1 | 49          | 12.9 |            |        | 318      | 1.94    | 61.0   | 84   | 26.4          | 40   | 12.6        |       |            |   |          |         |
|               | 7     | 695   | 3.89 | 56.0          | 208.0 | 29.9        | 98   | 14.1       |        |           | 387     | 2.09  | 5    |               |      |             |      |            |        |          |         |        |      |               |      |             |       |            |   |          |         |

## References

1. Goldberg, L. R. The structure of phenotypic personality traits. *Am. Psychol.* **48**, 26–34 (1993).
2. Murakami, Y. & Murakami, C. Scale construction of a ‘Big Five’ personality inventory. *Japanese J. Personal.* **6**, 29–39 (1997).
3. Davis, M. H. Measuring individual differences in empathy: Evidence for a multidimensional approach. *J. Pers. Soc. Psychol.* **44**, 113–126 (1983).
4. Nomura, K., Akai, S. & Morikawa, K. Pilot Japanese Interpersonal Reactivity Index. *in Proceedings of the Annual Meeting of Japanese Psychological Association* (2015).
5. Chrisite, R. & Geis, F. L. *Studies in Machiavellianism*. (Academic Press, 1970).
6. Toshitake, N. et al. Development and Validation of a Japanese Version of the Machiavellianism Scale. *Japanese J. Personal.* **20**, 233–235 (2012).
7. Cohen, S., Kamarck, T. & Mermelstein, R. A Global Measure of Perceived Stress. *J. Health Soc. Behav.* **24**, 385–396 (1983).
8. Katsunori, S. Reliability and validity of the Japanese version of the Perceived Stress Scale. *Japanese J. Heal. Psychol.* **19**, 44–53 (2006).
9. Charles, A. H. & Laury, S. K. Risk aversion and incentive effects. *Am. Econ. Rev.* **92**, 1644–1655 (2002).

10. Ikeda, S., Ohtake, F. & Yoshiro, T. Time Discount Rates: An Analysis Based on Economic Experiments and Questionnaire Surveys. *ISER Discuss. Pap.* **638**, (2005).
11. Rosenberg, M. *Society and the adolescent self-image*. (Princeton University Press, 1965).
12. Shigeo, S. Investigation of the Japanese version of Rosenberg's Self-esteem Scale. *Bull. Tsukuba Dev. Clin. Psychol.* **12**, 65–71 (2000).
13. Krieger, N., Williams, D. R. & Moss, N. E. Measuring Social Class in US Public Health Research: Concepts, Methodologies, and Guidelines. *Annu. Rev. Public Health* **18**, 341–378 (1997).
14. Okada, N. et al. Brief rating scale of socioeconomic status for biological psychiatry research among Japanese people : A scaling based on an educational history. *Japanese J. Biol. Psychiatry.* **25**, 115–117 (2014).
15. Van Lange, P. A. M. & Visser, K. Locomotion in social dilemmas: How people adapt to cooperative, tit-for-tat, and noncooperative partners. *J. Pers. Soc. Psychol.* **77**, 762–773 (1999).
16. Mori, K. Current Issues in the Measurement of Social Value Orientation. *Kwansei Gakuin Sociol. Dep. Stud.* **120**, 33–51 (2015).
17. Spielberger, C. D. *State-Trait Anxiety Inventory: Bibliography*. (Consulting

Psychologists Press, 1989).

18. Shimizu, H. & Imae, K. Development of a Japanese version of the state-trait anxiety inventory. *Japanese J. Educ. Psychol.* **29**, 62–67 (1981).

19. Green, L., Fry, A. F. & Myerson, J. Discounting of delayed rewards: A Life-Span Comparison. *Psychol. Sci.* **5**, 33–36 (1994).

20. Hiruma, F. A research on background factors of time discount rate by questionnaire measure. *Waseda Commer. Sci.* **432**, 1–34 (2012).

21. Fischbacher, U., Gächter, S. & Fehr, E. Are people conditionally cooperative? Evidence from a public goods experiment. *Economics Letters*, **71**, 397-404 (2001).

22. Gächter, S., Johnson, E. J. & Herrmann, A, Individual-Level Loss Aversion in Riskless and Risky Choices. *IZA Discussion Paper*. No. 2961 (2007). <https://ssrn.com/abstract=1010597>

23. Greenberg, D. M., Warrier, V., Allison, C. & Baron-Cohen, S. Testing the Empathizing–Systemizing theory of sex differences and the Extreme Male Brain theory of autism in half a million people *PNAS*. **115**, 12152-12157 (2018).

24. Lyubomirsky, S. & Lepper, H. S. A measure of subjective happiness: Preliminary reliability and construct validation. *Social Indicators Research*. **46**, 137–155 (1999).

25. Shimai, S., Otake, K., Utsuki, N., Ikemi, A. & Lyubomirsky, S. Development of a Japanese version of the subjective happiness scale (SHS), and examination of its validity and reliability. *Japanese Journal of Public Health*. **10**, 845–853 (2004).

26. Jensen, A. R. *The g factor: The science of mental ability*. (Praeger, 1998).
  
27. Nihonsugi, T., Ihara, A. & Haruno, M. Selective increase of intention-based economic decisions by noninvasive brain stimulation to the dorsolateral prefrontal cortex. *J. Neurosci.* **35**, 3412-3419 (2015).
